# Supplementary material for: Clinical symptoms in mild cognitive impairment with Lewy bodies: Frequency, time of onset, and discriminant ability
Source: PubMed Central journal article supplement (PMC10946617; doi:10.1111/ene.15783), 2023-03-21
Supplement: ENE-30-1585-s001.pdf [file ENE-30-1585-s001.pdf]

**Supplementary Table 1. The Symptom Questionnaire**

|                                                                                                                                                                                                                                                                                                                                                                                                                                                                                                                                                                                                                                                                                                                                                                                                                                               |                                                                                                                                                                                                                                                                                                                                                                                                                                                                                                                                                                                                                                                                                                                                                                                            |
|-----------------------------------------------------------------------------------------------------------------------------------------------------------------------------------------------------------------------------------------------------------------------------------------------------------------------------------------------------------------------------------------------------------------------------------------------------------------------------------------------------------------------------------------------------------------------------------------------------------------------------------------------------------------------------------------------------------------------------------------------------------------------------------------------------------------------------------------------|--------------------------------------------------------------------------------------------------------------------------------------------------------------------------------------------------------------------------------------------------------------------------------------------------------------------------------------------------------------------------------------------------------------------------------------------------------------------------------------------------------------------------------------------------------------------------------------------------------------------------------------------------------------------------------------------------------------------------------------------------------------------------------------------|
| <p><b>Cognitive Symptoms</b><br/> Memory<br/> Problem Solving<br/> Planning<br/> Fluctuating changes in concentration and attention<br/> Disorganised speech and conversation<br/> Unexplained episodes of confusion</p> <p><b>Parkinson's Symptoms</b><br/> Rigidity or stiffness in muscles<br/> Shuffling walk<br/> Tremor<br/> Slowness of movement<br/> Change in Handwriting<br/> Slack facial expression<br/> Drooling<br/> Loss/reduction of sense of smell<br/> Balance problems<br/> Frequent falls<br/> Change in posture<br/> Weak voice</p> <p><b>Behaviour/mood changes</b><br/> Seeing things that are not present<br/> Hearing things that are not present<br/> Depression<br/> Apathy (loss of interest and drive)<br/> Delusions (false beliefs)<br/> Hallucinations in other senses (e.g. touch or smell)<br/> Anxiety</p> | <p><b>Sleep Symptoms</b><br/> Troubled by vivid dreams<br/> Troubled by nightmares<br/> Had involuntary movements of arms and legs<br/> Acting out dreams, sometimes violently<br/> Cried out during sleep<br/> Excessive daytime sleepiness<br/> Transient loss of consciousness/unexplained blackouts<br/> Insomnia<br/> Restless legs syndrome</p> <p><b>Autonomic Dysfunction</b><br/> Dizziness, light-headedness or fainting<br/> Sensitivity to heat or cold<br/> Sexual Dysfunction<br/> Urinary incontinence<br/> Constipation</p> <p><b>Visual Symptoms</b><br/> Painful/dry eyes<br/> Double vision<br/> Difficulty reading (because words and letters move around the page)<br/> Misjudging objects (have difficulty moving around because you misjudge where objects are)</p> |
|-----------------------------------------------------------------------------------------------------------------------------------------------------------------------------------------------------------------------------------------------------------------------------------------------------------------------------------------------------------------------------------------------------------------------------------------------------------------------------------------------------------------------------------------------------------------------------------------------------------------------------------------------------------------------------------------------------------------------------------------------------------------------------------------------------------------------------------------------|--------------------------------------------------------------------------------------------------------------------------------------------------------------------------------------------------------------------------------------------------------------------------------------------------------------------------------------------------------------------------------------------------------------------------------------------------------------------------------------------------------------------------------------------------------------------------------------------------------------------------------------------------------------------------------------------------------------------------------------------------------------------------------------------|

**Supplementary Table 2. Time of onset of symptoms in MCI-AD and MCI-LB**

|                                                     | Onset (median (IQR)) relative to initial assessment |                    |      |
|-----------------------------------------------------|-----------------------------------------------------|--------------------|------|
|                                                     | MCI-AD                                              | MCI-LB             | p    |
| <i>Cognitive symptoms</i>                           |                                                     |                    |      |
| Memory                                              | -2.0 (-3.5, -2.0)                                   | -3.0 (-5.0, -2.0)  | 0.16 |
| Problem Solving                                     | -1.0 (-2.8, -0.7)                                   | -1.5 (-2.8, 0.0)   | 0.67 |
| Planning                                            | -1.5 (-4.2, 0.1)                                    | -1.0 (-2.0, -0.2)  | 0.43 |
| Fluctuations                                        | -1.5 (-4.0, 0.3)                                    | -1.0 (-2.0, -0.1)  | 0.48 |
| Disorganised Speech                                 | -1.5 (-3.7, -0.3)                                   | -0.5 (-2.0, 0.5)   | 0.16 |
| Confusion                                           | 0.8 (-1.3, 1.6)                                     | -0.8 (-1.7, 0.8)   | 0.36 |
| <i>Symptoms associated with Parkinson's disease</i> |                                                     |                    |      |
| Rigidity                                            | 0.0 (-2.8, 0.2)                                     | -0.8 (-2.8, 0.3)   | 0.61 |
| Shuffling                                           | -1.5 (-3.1, 0.4)                                    | -1.0 (-2.0, -0.1)  | 0.49 |
| Tremor                                              | -1.5 (-6.5, -0.5)                                   | -1.0 (-3.0, -0.1)  | 0.18 |
| Slowness                                            | -2.0 (-4.8, -0.4)                                   | -1.5 (-3.0, -0.5)  | 0.78 |
| Change in Writing                                   | -2.9 (-6.0, -1.0)                                   | -1.0 (-2.9, -0.5)  | <.01 |
| Slack facial exp.                                   | 0.4 (-2.0, 0.9)                                     | -0.2 (-1.4, 0.5)   | 0.93 |
| Drooling                                            | -0.1 (-0.9, 0.6)                                    | -0.5 (-2.0, -0.2)  | 0.07 |
| Loss of smell                                       | -2.0 (-21.3, -1.0)                                  | -6.2 (-17.1, -1.4) | 0.53 |
| Balance problems                                    | -1.5 (-4.5, -0.2)                                   | -1.0 (-2.5, -0.9)  | 0.59 |
| Frequent Falls                                      | 0.4 (-1.3, 0.6)                                     | -1.5 (-2.5, -0.3)  | 0.13 |
| Change in posture                                   | -1.0 (-5.0, 0.0)                                    | -1.0 (-3.0, -0.5)  | 0.61 |
| Weak Voice                                          | -1.8 (-3.0, -0.0)                                   | -0.7 (-2.0, 0.1)   | 0.33 |
| <i>Neuropsychiatric symptoms</i>                    |                                                     |                    |      |
| Seeing things                                       | -0.6 (-1.4, 0.6)                                    | -1.0 (-2.4, -0.1)  | 0.44 |
| Hearing things                                      | n/a                                                 | -0.5 (-2.0, 0.7)   | 0.84 |
| Depression                                          | -2.5 (-42.5, 0.6)                                   | -2.0 (-5.0, 0.5)   | 0.47 |
| Apathy                                              | -1.0 (-2.0, 0.1)                                    | -1.0 (-2.0, 0.4)   | 0.93 |
| Delusions                                           | n/a                                                 | 0.0 (-2.9, 0.7)    | 0.40 |
| Hallucinations other senses                         | -0.4 (-1.2, 0.3)                                    | -0.1 (-1.0, 0.9)   | 0.72 |
| Anxiety                                             | -2.0 (-20.5, 0.1)                                   | -3.3 (-40.0, 0.1)  | 0.49 |
| <i>Sleep symptoms</i>                               |                                                     |                    |      |
| Vivid Dreams                                        | -1.0 (-4.8, 0.0)                                    | -1.4 (-6.0, -0.3)  | 0.68 |
| Nightmares                                          | n/a                                                 | -1.3 (-10.0, 0.1)  | 0.54 |
| Involuntary movements in sleep                      | -3.9 (-6.5, 0.6)                                    | -2.8 (-10.0, -1.0) | 0.38 |
| Acting out Dreams                                   | n/a                                                 | -3.0 (-10.0, -1.0) | 0.12 |
| Cried Out                                           | -1.0 (-4.4, 0.3)                                    | -3.0 (-15.0, -0.7) | 0.06 |
| Excessive sleepiness                                | -1.5 (-3.9, -0.1)                                   | -1.0 (-3.0, 0.0)   | 0.60 |
| Blackouts                                           | -3.0 (-9.3, 0.3)                                    | n/a                | 0.22 |
| Insomnia                                            | -1.3 (-23.8, -0.1)                                  | -2.3 (-7.0, -0.1)  | 0.91 |
| Restless legs                                       | -1.5 (-46.3, 1.2)                                   | -5.5 (-15.0, -1.5) | 0.86 |
| <i>Autonomic symptoms</i>                           |                                                     |                    |      |
| Dizziness                                           | -2.0 (-7.0, -0.9)                                   | -2.0 (-3.3, -0.3)  | 0.64 |

|                                                                                                                                                                                                                             |                    |                    |      |
|-----------------------------------------------------------------------------------------------------------------------------------------------------------------------------------------------------------------------------|--------------------|--------------------|------|
| Sensitivity to heat/cold                                                                                                                                                                                                    | -3.0 (-20.0, -0.5) | -2.0 (-10.0, -1.0) | 1.00 |
| Sexual Dysfunction                                                                                                                                                                                                          | -2.4 (-9.3, -1.1)  | -4.0 (-10.0, -1.9) | 0.68 |
| Urinary incontinence                                                                                                                                                                                                        | -2.0 (-7.5, 0.0)   | -2.0 (-3.0, -0.1)  | 0.59 |
| Constipation                                                                                                                                                                                                                | -6.5 (-60.5, -1.6) | -2.0 (-12.5, -0.2) | 0.09 |
| <i>Visual symptoms</i>                                                                                                                                                                                                      |                    |                    |      |
| Dry eyes                                                                                                                                                                                                                    | -3.0 (-4.3, -1.6)  | -2.0 (-5.0, -0.3)  | 0.66 |
| Double vision                                                                                                                                                                                                               | -0.3 (-10.6, 2.3)  | -1.0 (-3.0, -0.3)  | 0.37 |
| Difficulty Reading                                                                                                                                                                                                          | -2.0 (-25.5, 0.2)  | -0.7 (-1.9, 1.6)   | 0.17 |
| Misjudging Objects                                                                                                                                                                                                          | -1.0 (-7.5, 3.1)   | -1.0 (-2.0, 0.4)   | 0.86 |
| Time of onset relative to baseline assessment in years. Time of onset not stated if present in less than 10% of participants. P=uncorrected p value. MCI mild cognitive impairment; AD Alzheimer's disease; LB Lewy bodies. |                    |                    |      |

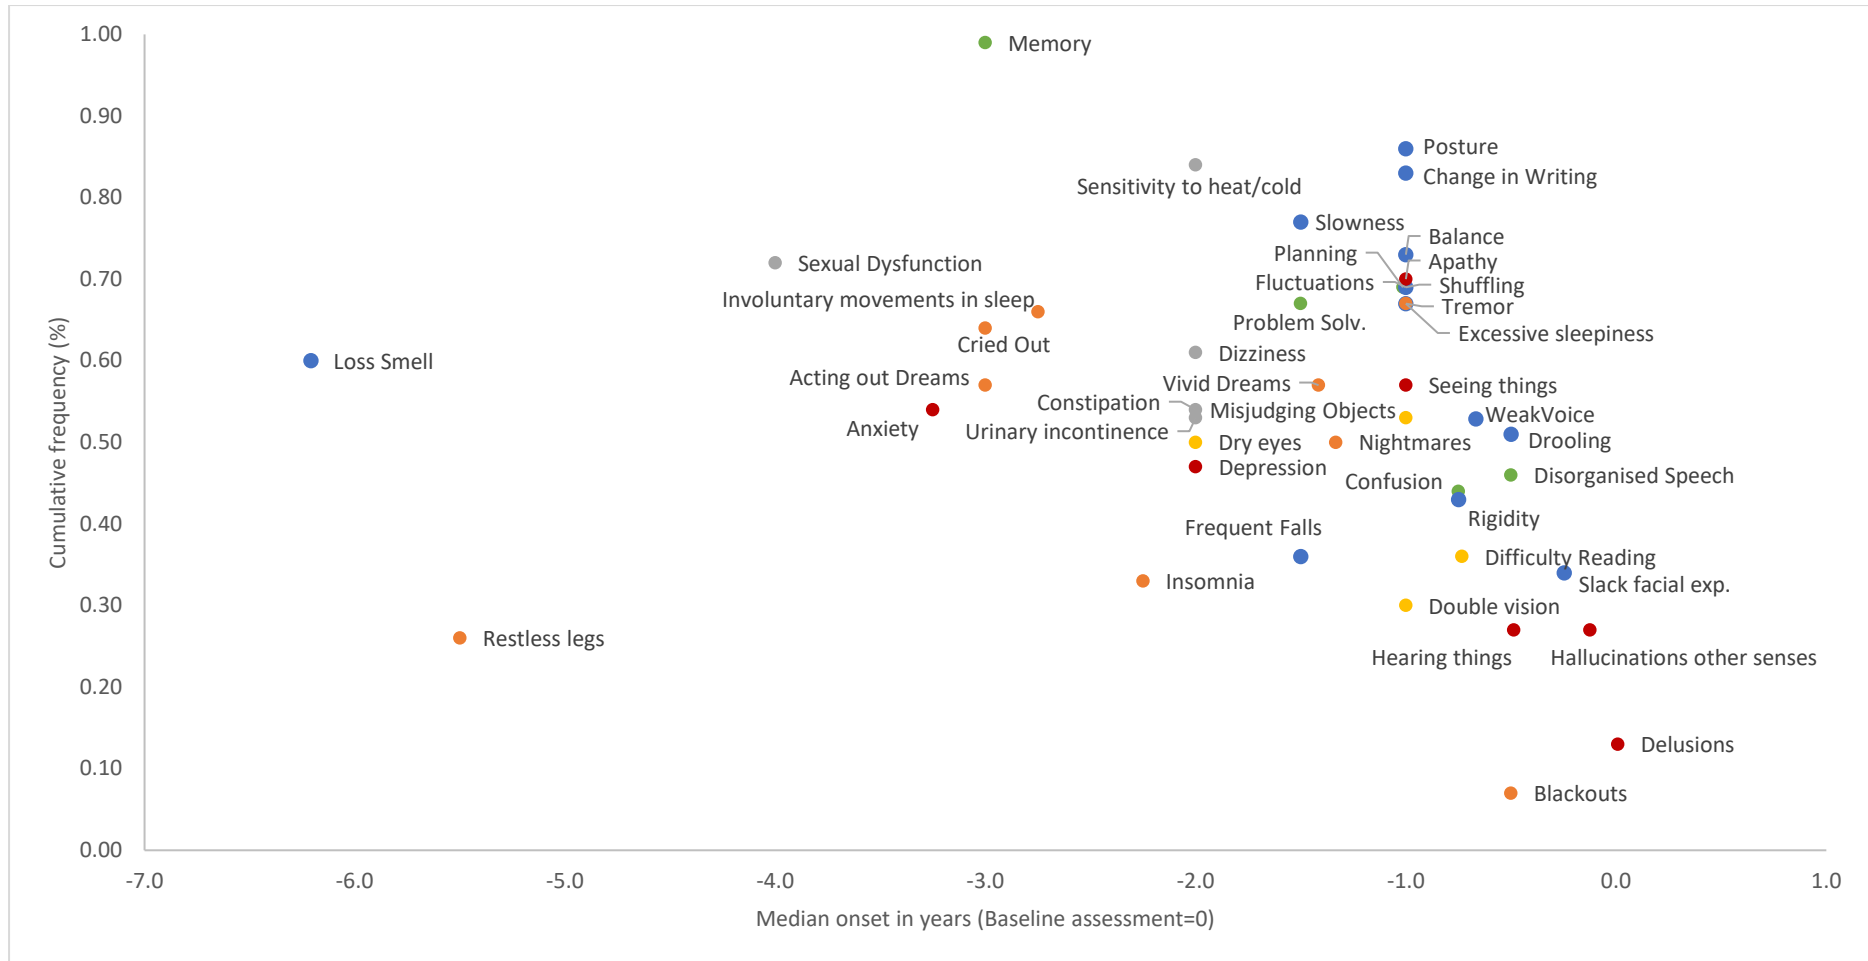

**Supplementary Figure 1. Scatterplot of median symptom onset and cumulative prevalence in MCI-LB.** Green – cognitive symptoms; blue – symptoms associated with Parkinson’s disease; red – neuropsychiatric symptoms; orange – sleep symptoms; grey – autonomic symptoms; yellow – visual symptoms.

**Supplementary Table 3: Baseline demographics and symptoms prevalence in the SUPeRB cohort**

|                                                     | Control    | MCI-AD     | MCI-LB      | p (MCI-AD v MCI-LB) |
|-----------------------------------------------------|------------|------------|-------------|---------------------|
| N                                                   | 33         | 29         | 29          |                     |
| Age                                                 | 74.3 (7.5) | 74.9 (7.1) | 74.2 (6.0)  | 0.92                |
| Sex, n (% male)                                     | 24 (73)    | 11 (38)    | 27 (83)     | <b>&lt;0.001</b>    |
| ACE-R, mean (SD)                                    | 92.7 (4.3) | 82.2 (8.2) | 81.8 (10.0) | 0.98                |
| Informant present, n (%)                            | -          | 24 (83)    | 28 (97)     | 0.19                |
| Live with informant, n (%)                          | -          | 16 (67)    | 26 (93)     | <b>0.03</b>         |
| AChI, n (%)                                         | 0 (0)      | 6 (21)     | 19 (66)     | <b>0.001</b>        |
| Levodopa, n (%)                                     | 0 (0)      | 0 (0)      | 2 (7)       | 0.49                |
| <i>Cognitive Symptoms</i>                           |            |            |             |                     |
| Memory, n (%)                                       | 7 (21)     | 29 (100)   | 29 (100)    | -                   |
| Problem Solving, n (%)                              | 1 (3)      | 7 (24)     | 13 (45)     | 0.10                |
| Planning, n (%)                                     | 0 (0)      | 4 (14)     | 12 (41)     | <b>0.02</b>         |
| Fluctuations, n (%)                                 | 4 (12)     | 3 (10)     | 16 (57)     | <b>&lt;0.001</b>    |
| Disorganized Speech, n (%)                          | 0 (0)      | 1 (4)      | 9 (31)      | <b>0.01</b>         |
| Episodes of Confusion, n (%)                        | 1 (3)      | 1 (3)      | 4 (15)      | 0.19                |
| <i>Symptoms associated with Parkinson's disease</i> |            |            |             |                     |
| Rigidity or stiffness, n (%)                        | 3 (9)      | 2 (7)      | 6 (21)      | 0.25                |
| Shuffling walk, n (%)                               | 1 (3)      | 2 (7)      | 13 (45)     | <b>0.001</b>        |
| Tremor, n (%)                                       | 5 (15)     | 7 (24)     | 13 (45)     | 0.10                |
| Slowness of movement, n (%)                         | 3 (9)      | 9 (31)     | 17 (59)     | <b>0.04</b>         |
| Change in writing, n (%)                            | 5 (15)     | 12 (41)    | 19 (66)     | 0.07                |
| Slack facial expression, n (%)                      | 0 (0)      | 1 (4)      | 5 (17)      | 0.19                |
| Drooling, n (%)                                     | 2 (6)      | 4 (14)     | 11 (38)     | <b>0.04</b>         |
| Loss of smell, n (%)                                | 5 (15)     | 8 (28)     | 15 (52)     | 0.06                |
| Balance problems, n (%)                             | 5 (15)     | 9 (31)     | 16 (59)     | <b>0.03</b>         |
| Frequent falls, n (%)                               | 0 (0)      | 2 (7)      | 4 (14)      | 0.67                |
| Change in posture, n (%)                            | 6 (18)     | 9 (31)     | 23 (79)     | <b>&lt;0.001</b>    |
| Weak voice, n (%)                                   | 2 (6)      | 6 (21)     | 12 (41)     | 0.09                |
| <i>Neuropsychiatric symptoms</i>                    |            |            |             |                     |
| Seeing things, n (%)                                | 0 (0)      | 2 (7)      | 7 (24)      | 0.14                |
| Hearing things, n (%)                               | 0 (0)      | 0 (0)      | 4 (14)      | 0.11                |
| Depression, n (%)                                   | 0 (0)      | 3 (10)     | 9 (31)      | 0.05                |
| Apathy, n (%)                                       | 0 (0)      | 6 (21)     | 10 (35)     | 0.24                |
| Delusions, n (%)                                    | 0 (0)      | 0 (0)      | 1 (4)       | 1                   |
| Other Hallucinations, n (%)                         | 2 (6)      | 1 (3)      | 5 (17)      | 0.19                |
| Anxiety, n (%)                                      | 2 (6)      | 8 (28)     | 12 (43)     | 0.23                |
| <i>Sleep symptoms</i>                               |            |            |             |                     |
| Vivid dreams, n (%)                                 | 0 (0)      | 2 (7)      | 15 (52)     | <b>&lt;0.001</b>    |
| Nightmares, n (%)                                   | 0 (0)      | 1 (3)      | 11 (38)     | <b>0.001</b>        |
| Involuntary movements, n (%)                        | 1 (3)      | 1 (3)      | 20 (69)     | <b>&lt;0.001</b>    |
| Acting out, n (%)                                   | 0 (0)      | 1 (3)      | 16 (55)     | <b>&lt;0.001</b>    |
| Crying out, n (%)                                   | 1 (3)      | 2 (7)      | 16 (55)     | <b>&lt;0.001</b>    |
| Excessive sleepiness, n (%)                         | 1 (3)      | 5 (18)     | 12 (41)     | 0.05                |
| Blackouts, n (%)                                    | 0 (0)      | 2 (7)      | 0 (0)       | 0.49                |
| Insomnia, n (%)                                     | 1 (3)      | 7 (24)     | 3 (10)      | 0.16                |

|                                                                                                                                                                                                                           |         |        |         |                  |
|---------------------------------------------------------------------------------------------------------------------------------------------------------------------------------------------------------------------------|---------|--------|---------|------------------|
| Restless legs, n (%)                                                                                                                                                                                                      | 3 (9)   | 1 (3)  | 5 (18)  | 0.10             |
| <i>Autonomic symptoms</i>                                                                                                                                                                                                 |         |        |         |                  |
| Dizziness, n (%)                                                                                                                                                                                                          | 4 (12)  | 5 (17) | 14 (48) | <b>0.01</b>      |
| Sensitivity to heat or cold, n (%)                                                                                                                                                                                        | 11 (33) | 7 (25) | 21 (72) | <b>&lt;0.001</b> |
| Sexual dysfunction, n (%)                                                                                                                                                                                                 | 6 (23)  | 4 (22) | 14 (56) | <b>0.03</b>      |
| Urinary incontinence, n (%)                                                                                                                                                                                               | 3 (9)   | 7 (25) | 14 (48) | 0.07             |
| Constipation, n (%)                                                                                                                                                                                                       | 5 (15)  | 6 (21) | 8 (28)  | 0.54             |
| <i>Visual Symptoms</i>                                                                                                                                                                                                    |         |        |         |                  |
| Dry/painful eyes, n (%)                                                                                                                                                                                                   | 10 (30) | 7 (24) | 9 (32)  | 0.50             |
| Double vision, n (%)                                                                                                                                                                                                      | 1 (3)   | 2 (7)  | 4 (14)  | 0.42             |
| Difficulty reading, n (%)                                                                                                                                                                                                 | 1 (3)   | 4 (14) | 8 (29)  | 0.19             |
| Misjudging objects, n (%)                                                                                                                                                                                                 | 3 (9)   | 3 (10) | 10 (37) | <b>0.02</b>      |
| Sexual dysfunction n=69, for all other variables n=89-91 (occasionally participants felt unable to answer). Bold: significant p<.05 (uncorrected). MCI mild cognitive impairment; AD Alzheimer's disease; LB Lewy bodies. |         |        |         |                  |

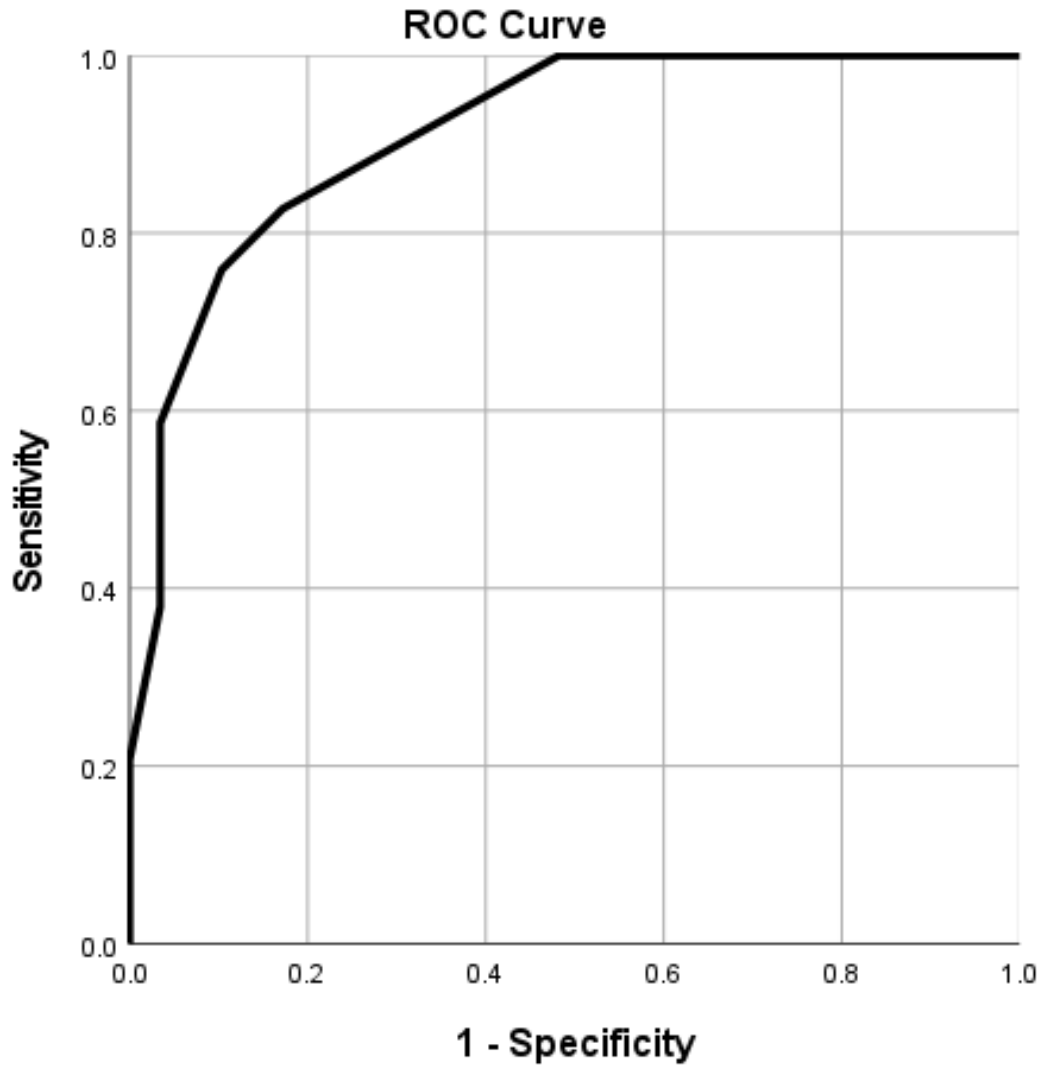

**Supplementary Figure 2. Receiver Operating Characteristic for the 10-point symptom scale to differentiate MCI-LB from MCI-AD. Area under ROC 0.91 (95% CI 0.84-0.98).**
